# Supplementary material for: Heterogeneous structured MoSe2–MoO3 quantum dots with enhanced sodium/potassium storage
Source: Royal Society of Chemistry journal article supplement (doi:10.1039/d0ta08674f), 2020-01-01
Supplement: d0ta08674f1.pdf [file d0ta08674f1.pdf]

### Supporting Information

#### Heterogeneous Structured MoSe<sub>2</sub>-MoO<sub>3</sub> Quantum Dots with Enhanced Sodium/Potassium Storage

Wen Liu,<sup>a, c</sup> Jujun Yuan,<sup>b\*</sup> Youchen Hao,<sup>a, c</sup> Hirbod Maleki Kheimeh Sari,<sup>a, c</sup>  
Jingjing wang,<sup>a, c</sup> Alibek Kakimov,<sup>a, c</sup> Wei Xiao,<sup>a, c</sup> Jian Qin,<sup>a, c</sup> Wenbin Li,<sup>a, c</sup> Chong  
Xie<sup>a, c</sup> Junhua Hu,<sup>d</sup> Jianhong Peng,<sup>e\*</sup> Xifei Li<sup>a, c\*</sup>

<sup>a</sup>Institute of Advanced Electrochemical Energy & School of Materials Science and Engineering, Xi'an University of Technology, Xi'an 710048, Shaanxi, China

<sup>b</sup>School of Physics and Electronics, Gannan Normal University, Ganzhou, 341000, PR China

<sup>c</sup>Shaanxi International Joint Research Center of Surface Technology for Energy Storage Materials, Xi'an 710048, Shaanxi, China

<sup>d</sup>State Center for International Cooperation on Designer Low-carbon & Environmental Materials (CDLCEM), Zhengzhou University, Zhengzhou, China

<sup>e</sup>School of Physical and Electronic Information Engineering, Qinghai Nationalities University, Xining, China

\*Corresponding author. E-mail: xfli2011@hotmail.com, yuanjujun123@163.com, pjhhj@sohu.com

## Electrochemical impedance spectroscopy (EIS) analysis

Each of the resulting impedance spectra comprises three regions: (i) a semicircle in high frequency region related to the solid electrolyte interphase (SEI); (ii) a semicircle in intermediate frequency region representing the charge interfacial capacitance and transfer resistance at the electrode/electrolyte interface; (iii) a sloping line in low frequency region associated with the Warburg impedance representing the Li-ion diffusion through the solid electrode. In the equivalent circuit as shown in Fig. S7,  $R_s$  represents the resistance of the electrolyte solution,  $R_f$  is the resistance of the surface SEI,  $R_{ct}$  corresponds to the charge transfer resistance, CPE is the capacitance of the electrode/electrolyte double layer, and  $W_s$  represents the Warburg impedance. All of the impedance spectra were fitted with the equivalent circuit to calculate the values of  $R_s$ , and  $R_{f+ct}$ , as listed in Table 1.

Meanwhile, the  $Na^+$  diffusion is measured based on the analysis of impedance and according to Equations (1) and (2):

$$D_{Na^+} = R^2 T^2 / 2 n^4 F^4 \sigma_w^2 A^2 C^2 \quad (1)$$

$$Z' = R + \sigma_w \omega^{-1/2} \quad (2)$$

EIS was employed to calculate the  $Na^+$  transfer coefficient to study the effect of crystallinity on sodium storage performance. In Equations (1) and (2),  $R$ ,  $T$ ,  $n$ ,  $F$ ,  $A$ ,  $C$ , and  $\sigma_w$  are the gas constant (8.314 J/(mol·K)), the absolute temperature (301.15 K), the number of electrons per molecule during oxidation (2), the Faraday's constant (96485 C mol<sup>-1</sup>), the surface area of the electrode (1.13 cm<sup>2</sup>), the  $Na^+$  concentration in the electrode material (1.0 mol L<sup>-1</sup>), and the Warburg coefficient, respectively.

### **Galvanostatic intermittent titration technique (GITT)**

For the GITT measurements, the cells were charged at a current density of  $0.05 \text{ A g}^{-1}$  for 20 min, followed by an open circuit relaxation for 2 h.

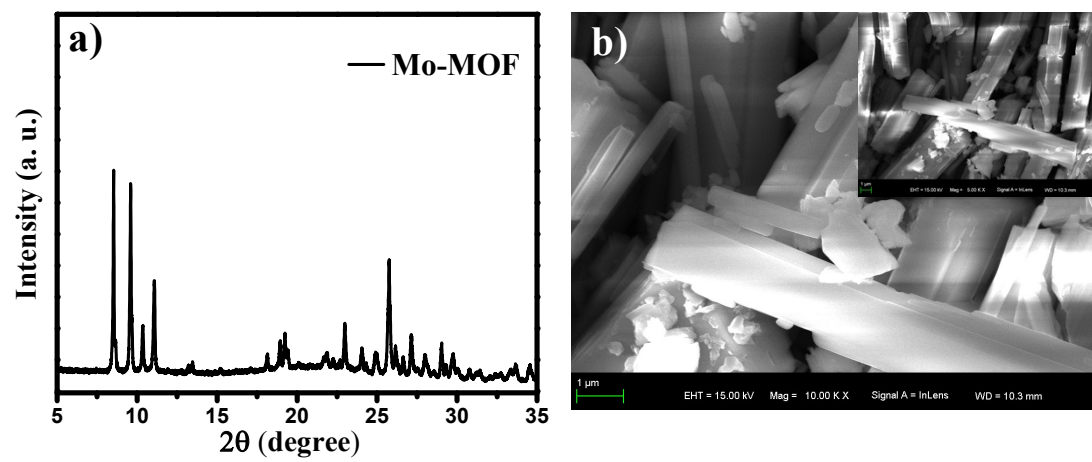

**Fig. S1.** a) XRD spectrum and b) SEM images of the synthesized molybdenum-based MOF (Mo-MOF).

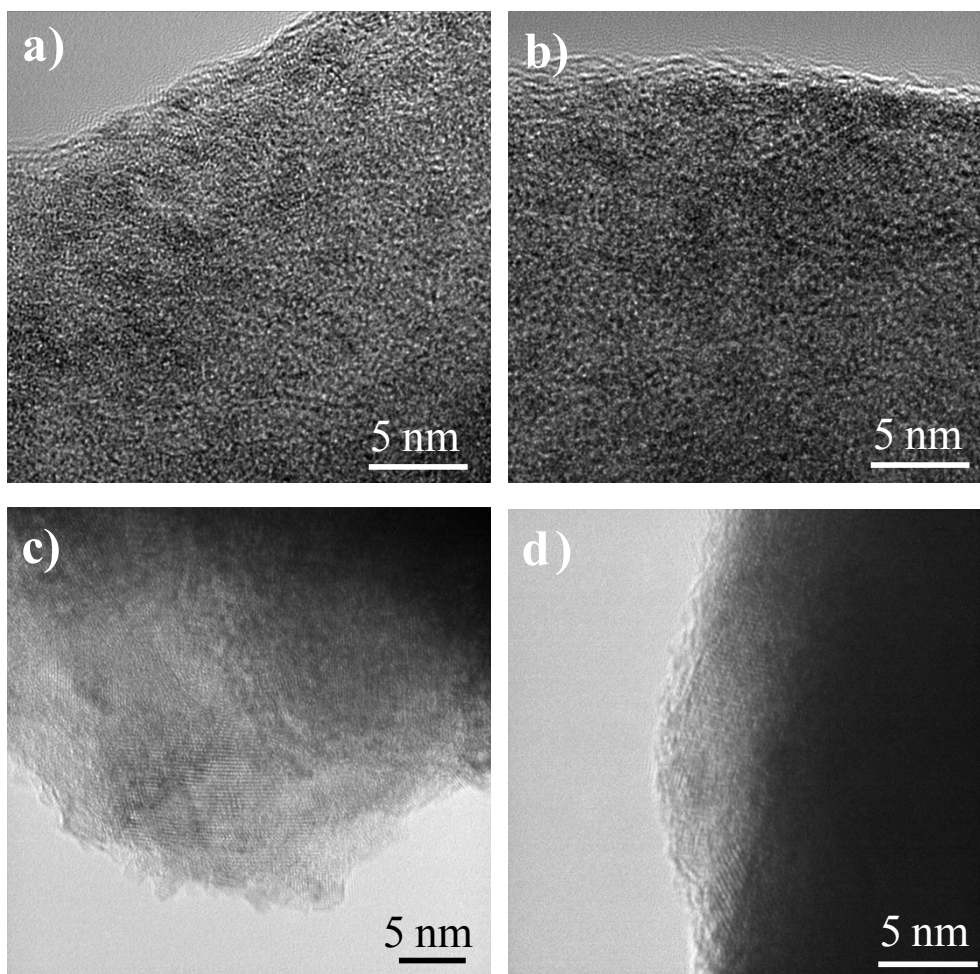

**Fig. S2.** HRTEM images of a, b) MoSe<sub>2</sub>-1 and c, d) MoSe<sub>2</sub>-4.

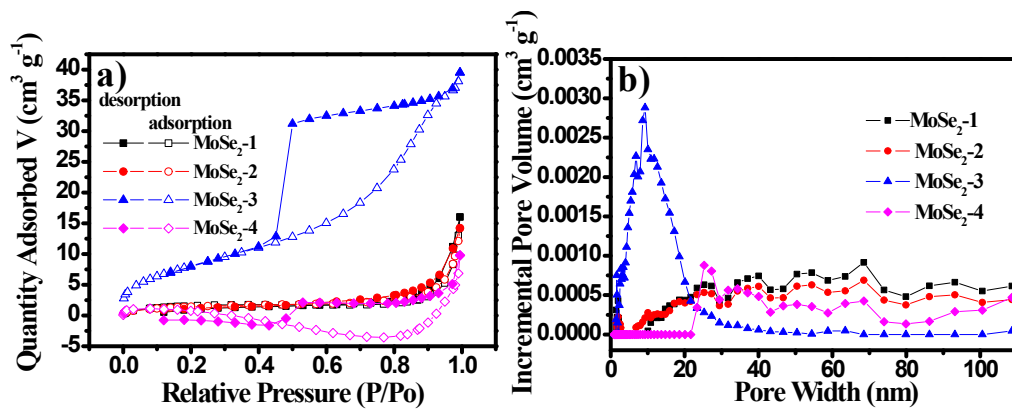

**Fig. S3.** a) Adsorption/desorption isotherms, b) The pore size distribution of MoSe<sub>2</sub>-1, MoSe<sub>2</sub>-2, MoSe<sub>2</sub>-3, and MoSe<sub>2</sub>-4.

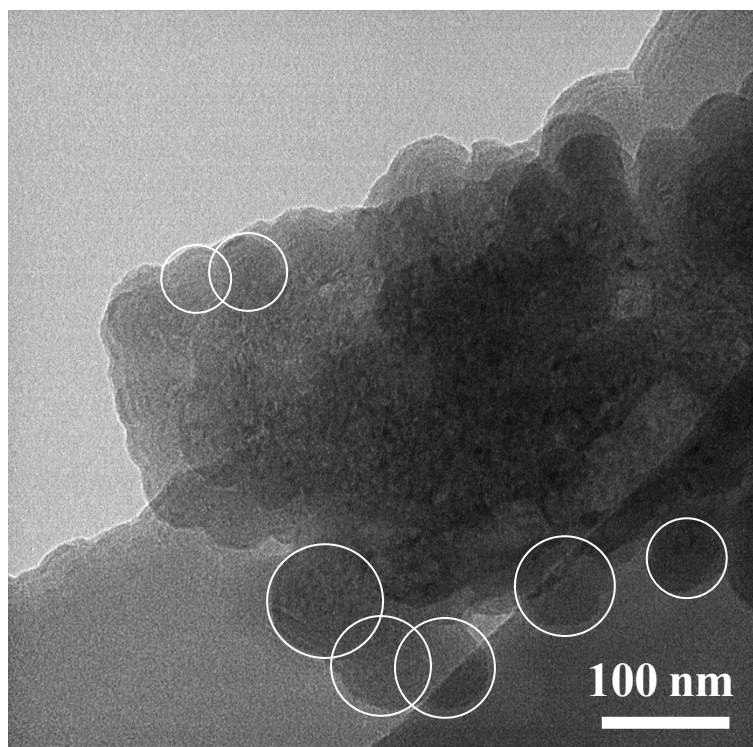

**Fig. S4.** TEM image of MoSe<sub>2</sub>-3.

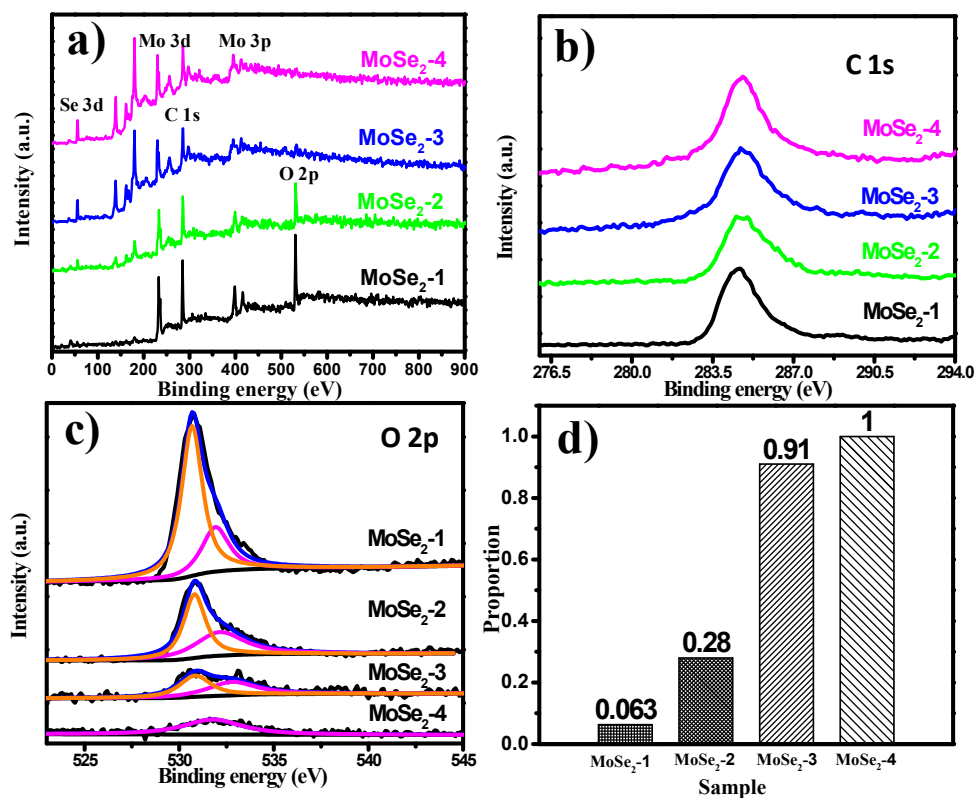

**Fig. S5.** XPS spectra of MoSe<sub>2</sub>-1, MoSe<sub>2</sub>-2, MoSe<sub>2</sub>-3, and MoSe<sub>2</sub>-4: a) The XPS full spectra for b) C 1s, and c) O 2p. d) The molar proportion of Mo from MoSe<sub>2</sub> in the total Mo content of samples.



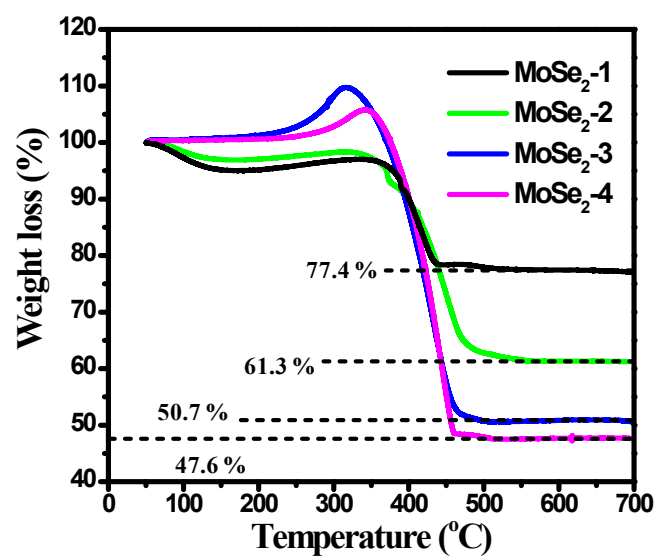

**Fig. S6.** TGA curves of MoSe<sub>2</sub>-1, MoSe<sub>2</sub>-2, MoSe<sub>2</sub>-3, and MoSe<sub>2</sub>-4.

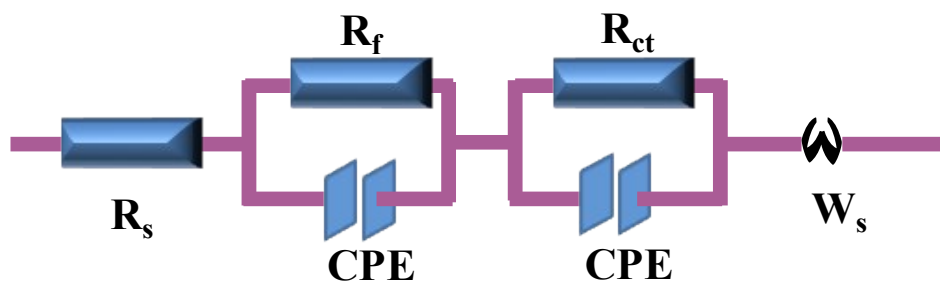

**Fig. S7.** The equivalent circuit for the fitting electrochemical impedance spectroscopy.

**Table S1.** The loading of MoO<sub>3</sub>, MoSe<sub>2</sub> and C in the four samples.

| samples              | The percentage of MoO <sub>3</sub> , MoSe <sub>2</sub> and C |                   |       |
|----------------------|--------------------------------------------------------------|-------------------|-------|
|                      | MoO <sub>3</sub>                                             | MoSe <sub>2</sub> | C     |
| MoSe <sub>2</sub> -1 | 72.53                                                        | 8.6               | 18.87 |
| MoSe <sub>2</sub> -2 | 44.2                                                         | 30.3              | 25.5  |
| MoSe <sub>2</sub> -3 | 4.54                                                         | 80.92             | 14.54 |
| MoSe <sub>2</sub> -4 | ---                                                          | 83.96             | 16.04 |

Table S2. The performance of optimized sample in this work in comparison with the previously reported MoSe<sub>2</sub> composites for SIBs.

| Anode                                  | Performance                            | Retention, Attenuation Per cycle | Ref.      |
|----------------------------------------|----------------------------------------|----------------------------------|-----------|
| MoSe <sub>2</sub> -MoO <sub>3</sub> /C | 400 mAh/g after 500 cycles at 0.1 A/g  | 90%, 0.02%                       | This work |
| MoSe <sub>2</sub> /N,P-rGO             | 378 mAh/g after 1000 cycles at 0.5 A/g | 87%, 0.013%                      | 1         |
| MoSe <sub>2</sub> /N-C                 | 329 mAh/g after 500 cycles at 1.0 A/g  | 88.5%, 0.023%                    | 2         |
| CNT/MoSe <sub>2</sub> /C               | 347 mAh/g after 500 cycles at 0.5 A/g  | 93.5%, 0.013%                    | 3         |
| MoSe <sub>2</sub> /N-C                 | 333 mAh/g after 500 cycles at 0.5 A/g  | 89.8%, 0.02%                     | 4         |
| MC-CNF/MoSe <sub>2</sub>               | 386 mAh/g after 300 cycles at 0.5 A/g  | 90.3%, 0.032%                    | 5         |
| MoSe <sub>2</sub> @C@G                 | 367 mAh/g after 200 cycles at 0.2 A/g  | 86.2%, 0.069%                    | 6         |
| MoSe <sub>2</sub> @C/N,P-rGO           | 337 mAh/g after 100 cycles at 0.5 A/g  | 90.3%, 0.097%                    | 7         |
| MoSe <sub>2</sub> /C                   | 404 mAh/g after 100 cycles at 0.2 A/g  | 82.9%, 0.171%                    | 8         |
| MoSe <sub>2</sub> /rGO                 | 247 mAh/g after 100 cycles at 0.1 A/g  | 82.3%, 0.177%                    | 9         |
| MoSe <sub>2</sub> /CNT                 | 296 mAh/g after 50 cycles at 1.0 A/g   | 83%, 0.34%                       | 10        |
| MoSe <sub>2</sub> /G                   | 358 mAh/g after 50 cycles at 0.4 A/g   | 95%, 0.1%                        | 11        |
| MoSe <sub>2</sub> nanoplates           | 369 mAh/g after 50 cycles at 0.1 A/g   | 71.9%, 0.562%                    | 12        |
| 1D-MoSe <sub>2</sub> @C                | 415 mAh/g after 30 cycles at 0.2 A/g   | 96.3%, 12.3%                     | 13        |

Table S3. The performance of optimized sample in this work in comparison with the previously reported MoSe<sub>2</sub> composites for PIBs.

| Anode                                  | Performance                            | Retention, Attenuation Per cycle | Ref.      |
|----------------------------------------|----------------------------------------|----------------------------------|-----------|
| MoSe <sub>2</sub> -MoO <sub>3</sub> /C | 302 mAh/g after 300 cycles at 0.05 A/g | 97.9%, 0.007%                    | This work |
| MoSe <sub>2</sub> /N-C                 | 258 mAh/g after 300 cycles at 0.1 A/g  | 92.7%, 0.024%                    | 14        |
| MoSe <sub>2</sub> /P, N-C              | 260 mAh/g after 200 cycles at 0.1 A/g  | 93.9%, 0.030%                    | 15        |
| MoSe <sub>2</sub> /C                   | 322 mAh/g after 100 cycles at 0.2 A/g  | 83.9%, 0.161%                    | 16        |
| HM-MoSe <sub>2</sub> /N-C              | 223 mAh/g after 100 cycles at 0.1 A/g  | 85.1%, 0.149%                    | 17        |
| MoSe <sub>2</sub> /C fibers            | 316 mAh/g after 100 cycles at 0.1 A/g  | 63.2%, 0.368%                    | 18        |
| MoSe <sub>2</sub> @N-CNT               | 247 mAh/g after 100 cycles at 0.1 A/g  | 56.1%, 0.439%                    | 19        |
| N-MoSe <sub>2</sub> /G                 | 330 mAh/g after 30 cycles at 0.2 A/g   | 82.1%, 0.597%                    | 20        |

#### References.

1. F. Niu, J. Yang, N. Wang, D. Zhang, W. Fan, J. Yang and Y. Qian, *Adv. Funct. Mater.*, 2017, **27**, 1700522.
2. F. Zheng, W. Zhong, Q. Deng, Q. Pan, X. Ou, Y. Liu, X. Xiong, C. Yang, Y. Chen and M. Liu, *Chem. Eng. J.*, 2019, **357**, 226-236.
3. M. Yousaf, Y. Wang, Y. Chen, Z. Wang, A. Firdous, Z. Ali, N. Mahmood, R. Zou, S. Guo and R. P. S. Han, *Adv. Energy Mater.*, 2019, **9**, 1900567.
4. G. Jia, H. Wang, D. Chao, H. He, N. H. Tiep, Y. Zhang, Z. Zhang and H. J. Fan, *Nanotechnology*, 2017, **28**, 42LT01.
5. S. Young Jeong, S. Ghosh, J.-K. Kim, D.-W. Kang, S. Mun Jeong, Y. Chan Kang and J. S. Cho, *Journal of Industrial and Engineering Chemistry*, 2019, **75**, 100-107.
6. C. Cui, G. Zhou, W. Wei, L. Chen, C. Li and J. Yue, *J. Alloy Compd.*, 2017, **727**, 1280-1287.

7. L. B. Tang, B. Zhang, C. S. An, H. Li, B. Xiao, J. H. Li, Z. J. He and J. C. Zheng, *Inorganic chemistry*, 2019, **58**, 8169-8178.
8. Q. Su, X. Cao, X. Kong, Y. Wang, C. Peng, J. Chen, B. Yin, J. Shi, S. Liang and A. Pan, *Electrochim. Acta.*, 2018, **292**, 339-346.
9. B.-M. Zhang, C.-B. Zhang, H. Zhang, Y.-X. Hu, Y.-S. Zhang, C. Lu, J. Li, L.-B. Kong and M.-C. Liu, *Applied Surface Science*, 2020, **513**, 145826.
10. S. H. C. a. Y. C. Kang\*, *Nanoscale*, 2016, **8**, 4209-4216.
11. X. Zhao, W. Cai, Y. Yang, X. Song, Z. Neale, H.-E. Wang, J. Sui and G. Cao, *Nano Energy*, 2018, **47**, 224-234.
12. H. Wang, X. Lan, D. Jiang, Y. Zhang, H. Zhong, Z. Zhang and Y. Jiang, *J. Power Sources*, 2015, **283**, 187-194.
13. S. Tian, *Ceram Int*, 2019, **45**, 21423-21429.
14. J. Ge, L. Fan, J. Wang, Q. Zhang, Z. Liu, E. Zhang, Q. Liu, X. Yu and B. Lu, *Adv. Energy Mater.*, 2018, **8**, 1801477.
15. B. Li, Y. Liu, Y. Li, S. Jiao, S. Zeng, L. Shi and G. Zhang, *ACS Appl. Mater. Interfaces*, 2020, **12**, 2390-2399.
16. W. Wang, B. Jiang, C. Qian, F. Lv, J. Feng, J. Zhou, K. Wang, C. Yang, Y. Yang and S. Guo, *Adv. Mater.*, 2018, **30**, e1801812.
17. Y. Liu, Y. Zhai, N. Wang, Y. Zhang, Z. Lu, P. Xue, L. Bai, M. Guo, D. Huang and Z. Bai, *ChemistrySelect*, 2020, **5**, 2412-2418.
18. Q. Shen, P. Jiang, H. He, C. Chen, Y. Liu and M. Zhang, *Nanoscale*, 2019, **11**, 13511-13520.

19. N. Li, L. Sun, K. Wang, J. Zhang and X. Liu, *Electrochim. Acta*, 2020, **360**, 136983.
20. Y. Yi, Z. Sun, C. Li, Z. Tian, C. Lu, Y. Shao, J. Li, J. Sun and Z. Liu, *Adv. Funct. Mater.*, 2020, **30**, 1903878.
